# Supplementary material for: Systematic review of the effectiveness of community-based self-management interventions among primary care COPD patients
Source: PubMed Central journal article supplement (PMC6251904; doi:10.1038/s41533-018-0111-9), 2018-11-23
Supplement: 41533_2018_111_MOESM1_ESM.pdf [file 41533_2018_111_MOESM1_ESM.pdf]

**Supplementary Table 1.Characteristics of included RCTs**

| Author year (country)                    | Intervention                                                                                                                                                                                                                                                                                                                                                       |              | Control                                                                                                                                                                                                                                                                                     | Recruitment**                                                                      | Inclusion Criteria                                                                                                                    | Sample size | Mean age (SD)                                                       | Sex (%male) | Mean FEV <sub>1</sub> % predicted (SD)                     | Follow-up (mths)                          | Outcomes                                                                                                                                                             |
|------------------------------------------|--------------------------------------------------------------------------------------------------------------------------------------------------------------------------------------------------------------------------------------------------------------------------------------------------------------------------------------------------------------------|--------------|---------------------------------------------------------------------------------------------------------------------------------------------------------------------------------------------------------------------------------------------------------------------------------------------|------------------------------------------------------------------------------------|---------------------------------------------------------------------------------------------------------------------------------------|-------------|---------------------------------------------------------------------|-------------|------------------------------------------------------------|-------------------------------------------|----------------------------------------------------------------------------------------------------------------------------------------------------------------------|
|                                          | Description                                                                                                                                                                                                                                                                                                                                                        | Length (wks) |                                                                                                                                                                                                                                                                                             |                                                                                    |                                                                                                                                       |             |                                                                     |             |                                                            |                                           |                                                                                                                                                                      |
| Billington et al (2015)<br><br>UK        | <b>Nurse-led telephone interventions</b><br>Usual care plus nurse practitioner telephone calls at week 3 and 5 post baseline. Unscripted phone calls to improve self-management lasting for a maximum of 25 minutes each. Information in phone calls focused on using a self-management plan to manage symptoms and initiate emergency medication use.             | 6 weeks      | <b>Usual care</b>                                                                                                                                                                                                                                                                           | General practices using disease registers                                          | On the COPD register (FEV <sub>1</sub> /FVC<0.7), able to speak and read English to give informed consent and complete questionnaire. | 73          | Int<br>72.09 (9.24)<br><br>UC<br>71.97 (11.04)                      | 47.9%       |                                                            | 3 months                                  | COPD assessment tool (CAT)<br>Health service use ( A&E and hospital admissions)<br>Exacerbations in the previous 3 months                                            |
| Bischoff et al (2012)<br><br>Netherlands | <b>Self-management programme</b><br>Modified version of Canadian SMP titled “Living Well with COPD” (excl. of exercise programme, but incl. action plan, COPD disease knowledge, respiratory drugs, breathing techniques, managing exacerbations, maintaining a healthy lifestyle, managing stress and anxiety, and home exercise. Action plans were personalised. | 4-6          | <b>Usual care</b><br>Care from their general practitioner when there is an exacerbation of symptoms. Did not receive care from practice nurse.<br><br><b>Routine Monitoring group</b><br>Practice nurses completing scheduled routine monitoring visits in general practice on top of usual | Patients on COPD registers at 15 general practices invited for baseline assessment | Aged 35 years or more<br>FEV <sub>1</sub> /FVC<0.7                                                                                    | 165         | SM<br>65.5 (11.5)<br><br>RMG<br>65.8 (8.3)<br><br>UC<br>63.5 (10.3) | 64.8        | SM 66.3 (16.5)<br><br>RMG 65.8 (8.3)<br><br>UC 63.5 (10.3) | 6, 12, 18 and 24<br><br>Reported 6 and 24 | <b>Primary outcomes</b><br>HRQoL<br><br><b>Secondary outcomes</b><br>Chronic respiratory questionnaire<br>Frequency of exacerbations and management<br>Self-Efficacy |

| Author year (country)             | Intervention                                                                                                                                                                                                                                                                                                                  |              | Control                                                                                                                             | Recruitment**                                      | Inclusion Criteria                                                                                                                                                                                               | Sample size | Mean age (SD)                         | Sex (%male) | Mean FEV <sub>1</sub> % predicted (SD) | Follow-up (mths)            | Outcomes                                                                           |
|-----------------------------------|-------------------------------------------------------------------------------------------------------------------------------------------------------------------------------------------------------------------------------------------------------------------------------------------------------------------------------|--------------|-------------------------------------------------------------------------------------------------------------------------------------|----------------------------------------------------|------------------------------------------------------------------------------------------------------------------------------------------------------------------------------------------------------------------|-------------|---------------------------------------|-------------|----------------------------------------|-----------------------------|------------------------------------------------------------------------------------|
|                                   | Description                                                                                                                                                                                                                                                                                                                   | Length (wks) |                                                                                                                                     |                                                    |                                                                                                                                                                                                                  |             |                                       |             |                                        |                             |                                                                                    |
|                                   | Programme delivered by the practice nurse individually in 2 to 4 one hour sessions delivered in general practice. Each patient received minimum 2 sessions and 6 reinforcement tel. calls.                                                                                                                                    |              | care. Assessment of symptoms, medication/inhaler adherence, frequency of exacerbations.                                             |                                                    |                                                                                                                                                                                                                  |             |                                       |             |                                        |                             |                                                                                    |
| Coultas et al (2005)<br>USA       | Three arm trial: usual care (UC), nurse assisted medical management (MM); nurse assisted collaborative management (CM)<br><br>MM and CM delivered by nurses, MM designed to enhance patient knowledge about COPD and symptoms. CM was enhanced MM focusing on behavioural change. 1 x home nurse visit; X x telephone contact | 6 months     | <b>Usual care</b> received two educational booklets from the American Lung Association and advised to follow advice from physician. | 17 sites as part of a urban academic health centre | Aged 45 years or more, current or former smoker with 20 pack year history, encountered cough, shortness of breath or wheeze during the past 12 months, FEV <sub>1</sub> /FVC<0.7 FEV <sub>1</sub> <80% predicted | 217         | 69 (8.2)                              | 43.1%       |                                        | 6 months                    | SGRQ<br>SF-36<br>Illness intrusiveness<br>Health care utilisation<br>Self-efficacy |
| Efrainsson et al (2008)<br>Sweden | Patients completed 2 visits with study nurse.<br><br>Intervention group completed 2 additional visits for self-care education<br><br><b>Self –care education</b>                                                                                                                                                              | 12-20        | <b>No treatment.</b> Patients offered self-care education post data collection.                                                     | Referral by physician                              | Diagnosed with mild, moderate, severe or very severe COPD based on spirometry using the GOLD criteria                                                                                                            | 52          | Int 66 (9.4)<br><br>Control 67 (10.4) | 50%         |                                        | Post intervention (5 month) | QoL<br>SGRQ<br>Smoking<br>Knowledge of COPD                                        |

| Author year (country)              | Intervention                                                                                                                                                                                                                                                                                                                                                                                                     |              | Control           | Recruitment**     | Inclusion Criteria                                                                                                                                                                                | Sample size                  | Mean age (SD)                       | Sex (%male) | Mean FEV <sub>1</sub> % predicted (SD) | Follow-up (mths) | Outcomes                                              |
|------------------------------------|------------------------------------------------------------------------------------------------------------------------------------------------------------------------------------------------------------------------------------------------------------------------------------------------------------------------------------------------------------------------------------------------------------------|--------------|-------------------|-------------------|---------------------------------------------------------------------------------------------------------------------------------------------------------------------------------------------------|------------------------------|-------------------------------------|-------------|----------------------------------------|------------------|-------------------------------------------------------|
|                                    | Description                                                                                                                                                                                                                                                                                                                                                                                                      | Length (wks) |                   |                   |                                                                                                                                                                                                   |                              |                                     |             |                                        |                  |                                                       |
|                                    | Based on motivational dialogue and tailored to severity based on the following component: description of the physiological effects of COPD, respiratory function, explanation of medication, prevention of exacerbations, assessment of breathing techniques, information about exercise, diet, psycho-social counselling, infection prevention, and an individual treatment plan.<br><br>Nurse led intervention |              |                   |                   |                                                                                                                                                                                                   |                              |                                     |             |                                        |                  |                                                       |
| Freund et al (2016)<br><br>Germany | <b>Care management intervention</b><br>Protocol-based care management, including structured assessment, action planning, and monitoring delivered by medical assistants, compared with usual care                                                                                                                                                                                                                | 12 months    | <b>Usual care</b> | General practices | Aged 18 years or over, receiving medical treatment for at least one of the following: T2DM, COPD, or chronic heart failure. Further, patients had to have a high risk for future hospitalisation. | 543 with COPD (2076 overall) | Int 71.6 (9.6)<br><br>UC 72.4 (9.6) | 48.0%       |                                        | 12, 24 months    | Hospitalisations<br>QoL (SF-12)<br>EQ-5D<br>Mortality |

| Author year (country)   | Intervention                                                                                                                                                                                                                                                                                                                                                                                                                       |                                | Control                                                                                                                                                           | Recruitment**                    | Inclusion Criteria                                                                                                                                                                                                                                                                                                           | Sample size | Mean age (SD)                                          | Sex (%male) | Mean FEV <sub>1</sub> % predicted (SD)                 | Follow-up (mths)             | Outcomes                                                                                 |
|-------------------------|------------------------------------------------------------------------------------------------------------------------------------------------------------------------------------------------------------------------------------------------------------------------------------------------------------------------------------------------------------------------------------------------------------------------------------|--------------------------------|-------------------------------------------------------------------------------------------------------------------------------------------------------------------|----------------------------------|------------------------------------------------------------------------------------------------------------------------------------------------------------------------------------------------------------------------------------------------------------------------------------------------------------------------------|-------------|--------------------------------------------------------|-------------|--------------------------------------------------------|------------------------------|------------------------------------------------------------------------------------------|
|                         | Description                                                                                                                                                                                                                                                                                                                                                                                                                        | Length (wks)                   |                                                                                                                                                                   |                                  |                                                                                                                                                                                                                                                                                                                              |             |                                                        |             |                                                        |                              |                                                                                          |
| Howard et al (2014)     | <p><b>COPD breathless manual (CM)</b><br/>Developed by health psychologist, consisting of a five week intervention divided into six sections covering: what is COPD, breathlessness, control breathlessness, exercises, relaxation, and summary. Aim was to manage distress to prevent A&amp;E and hospital admissions. Patients asked to complete weekly exercises, provide a breathlessness rating, and use a relaxation CD.</p> | 5 weeks                        | <p><b>Information booklets</b><br/>Patients received a series of British Lung Foundation COPD booklets and were encouraged to work through them over 5 weeks.</p> | General practices                | Diagnosis of COPD (FEV <sub>1</sub> /FVC<0.7), or if FEV <sub>1</sub> is equal to or above 80% predicted normal with other respiratory symptoms being present such as breathlessness or cough); (Medical research Council) MRC grade 3 or above; willingness to participate; informed consent; and read and write in English | 222         | Int<br>71.2<br>(10.4)<br><br>Control<br>73.2<br>(11.4) | 42.5%       | Int<br>55.9<br>(15.7)<br><br>Control<br>59.6<br>(15.9) | 6 weeks, 6 months, 12 months | Hospital admissions (A&E and frequency and duration of admissions)<br>HADS<br>CRQ-SR     |
| Lou (2015)<br><br>China | <p><b>Management group</b><br/>136 GPs undertook 2 days training.<br/><br/>48 lectures at 2-weekly intervals covering COPD information, observation of inhaler technique, medication adjustment, smoking cessation</p>                                                                                                                                                                                                             | Unclear – lectures for 2 years | <p><b>Usual care plus telephone</b> call to caregiver every 2 months to assess patient's condition.</p>                                                           | 14 community health care centres | COPD according to GOLD criteria. Excluded acute respiratory illness, other lung conditions or procedures that could                                                                                                                                                                                                          | 8217        | Int<br>61.6<br>(13.5)<br><br>UC<br>61.4<br>(13.2)      | 48.0%       |                                                        | 48 months                    | <b>Primary outcome:</b><br>BODE (6MWD, FEV <sub>1</sub> %pred, MMRC dyspnoea scale, BMI) |

| Author year<br>(country)        | Intervention                                                                                                                                                                                                                                                                                                                                                                                                     |                 | Control           | Recruitment**                      | Inclusion<br>Criteria                                                       | Sample<br>size | Mean<br>age<br>(SD)                            | Sex<br>(%male) | Mean<br>FEV <sub>1</sub> %<br>predicted<br>(SD)         | Follow-up<br>(mths) | Outcomes                                                                                                                                                                     |
|---------------------------------|------------------------------------------------------------------------------------------------------------------------------------------------------------------------------------------------------------------------------------------------------------------------------------------------------------------------------------------------------------------------------------------------------------------|-----------------|-------------------|------------------------------------|-----------------------------------------------------------------------------|----------------|------------------------------------------------|----------------|---------------------------------------------------------|---------------------|------------------------------------------------------------------------------------------------------------------------------------------------------------------------------|
|                                 | Description                                                                                                                                                                                                                                                                                                                                                                                                      | Length<br>(wks) |                   |                                    |                                                                             |                |                                                |                |                                                         |                     |                                                                                                                                                                              |
|                                 | counselling, vaccination information, encouragement to exercise, hand hygiene, rehabilitation and psychological counselling. Face-to-face contact with GP every 2 weeks. Team of specialists monitored GP reports and provided feedback.                                                                                                                                                                         |                 |                   |                                    | affect spirometry.                                                          |                |                                                |                |                                                         |                     | <b>Secondary outcomes:</b><br>HADS<br>Smoking,<br>Health service use (hospital admissions, ED visits)<br>Mortality                                                           |
| Mitchell et al (2014)<br><br>UK | <b>SPACE FOR COPD</b><br>Based on a manual containing educational material and home exercise programme. Includes goal setting, coping planning and case studies. Exercise regime included daily walking, resistance training using free weights 3 times per week. Action plan for exacerbation management included.<br><br>Delivered by a physiotherapist (30-45 min baseline consultation, two telephone calls) | 6 weeks         | <b>Usual care</b> | 30 primary care practice registers | FEV <sub>1</sub> /FVC<0.7<br>MRC grade 2-5<br>Clinically stable for 4 weeks | 184            | SPACE<br>69<br>(8.0)<br><br>UC<br>69<br>(10.1) | 54.9%          | SPACE<br>56.04<br>(16.76)<br><br>UC<br>59.60<br>(17.42) | 6 months            | <b>Primary outcome</b><br>CRQ-SR<br>dyspnoea<br><br><b>Secondary outcomes</b><br>fatigue, emotion and mastery domains of the CRQ-SR, BCKQ, HADS, ISWT, ESWT, PRAISE, Smoking |

| Author year (country)               | Intervention                                                                                                                                                                                                                                                                                             |              | Control                                                                       | Recruitment**                                | Inclusion Criteria                                                                                                                                               | Sample size | Mean age (SD)                                  | Sex (%male) | Mean FEV <sub>1</sub> % predicted (SD)            | Follow-up (mths)                   | Outcomes                                                                                          |
|-------------------------------------|----------------------------------------------------------------------------------------------------------------------------------------------------------------------------------------------------------------------------------------------------------------------------------------------------------|--------------|-------------------------------------------------------------------------------|----------------------------------------------|------------------------------------------------------------------------------------------------------------------------------------------------------------------|-------------|------------------------------------------------|-------------|---------------------------------------------------|------------------------------------|---------------------------------------------------------------------------------------------------|
|                                     | Description                                                                                                                                                                                                                                                                                              | Length (wks) |                                                                               |                                              |                                                                                                                                                                  |             |                                                |             |                                                   |                                    |                                                                                                   |
| Rea et al (2003)<br><br>New Zealand | <b>Chronic disease management programme</b><br>Care plan for regular maintenance checks and goals for lifestyle changes.<br><br>Education about smoking cessation, medication and use of inhalers<br><br>Delivered by respiratory physician (quarterly) and nurse (monthly). Single home visit.          | 12 months?   | <b>Conventional care</b><br>Access to guidelines and pulmonary rehabilitation | GP practices                                 |                                                                                                                                                                  | 135         | 68                                             | (42)        | 51.1                                              | 12                                 | Hospital admissions<br>Quality of life<br>Medication                                              |
| Taylor et al (2012)<br><br>UK       | <b>Better Living with Long term Airways disease (BELLA)</b><br>Modified version of CDSMP used by the Expert Patients Programme (EPP). Addressed five core areas: defining the problem, decision making, finding and using resources, forming partnerships with health care providers, and taking action. | 7 weeks      | <b>Usual care</b><br>Standard GP and respiratory care                         | 10 primary care teams from disease registers | Aged 35 years or more, FEV <sub>1</sub> /FVC<0.7, post-bronchodilator FEV <sub>1</sub> <80% predicted or exacerbation of COPD leading to unscheduled health care | 116         | Int<br>69<br>(9.8)<br><br>UC<br>70.5<br>(10.0) | 45.7%       | Int<br>53.9<br>(22.6)<br><br>UC<br>54.6<br>(23.4) | 2 (Post intervention) and 6 months | SGRQ<br>EQ5D<br>HRQoL<br>HADS<br>Stanford Self-Efficacy scales<br>Stanford Self-management scales |

| Author year (country)             | Intervention                                                                                                                                                                                                                                                                                                      |              | Control                                                                                | Recruitment**                                   | Inclusion Criteria                                                                                                                                           | Sample size | Mean age (SD)                                     | Sex (%male) | Mean FEV <sub>1</sub> % predicted (SD)            | Follow-up (mths) | Outcomes                                                                                                                                                                                      |
|-----------------------------------|-------------------------------------------------------------------------------------------------------------------------------------------------------------------------------------------------------------------------------------------------------------------------------------------------------------------|--------------|----------------------------------------------------------------------------------------|-------------------------------------------------|--------------------------------------------------------------------------------------------------------------------------------------------------------------|-------------|---------------------------------------------------|-------------|---------------------------------------------------|------------------|-----------------------------------------------------------------------------------------------------------------------------------------------------------------------------------------------|
|                                   | Description                                                                                                                                                                                                                                                                                                       | Length (wks) |                                                                                        |                                                 |                                                                                                                                                              |             |                                                   |             |                                                   |                  |                                                                                                                                                                                               |
|                                   | Delivered by two trained peers (one with COPD), using a structured, manualised, 3 hour session, weekly in a community setting                                                                                                                                                                                     |              |                                                                                        |                                                 |                                                                                                                                                              |             |                                                   |             |                                                   |                  |                                                                                                                                                                                               |
| Walters et al (2013)<br>Australia | <p><b>Health Mentoring</b><br/>Five core components; psychoeducation about COPD diagnosis and treatment; self-management skills; cognitive coping skills; communication skills; promoting self-efficacy.</p> <p>Delivered by trained community health nurses giving sixteen 30 minute telephone consultations</p> | 12 months    | <b>Usual care</b><br>Group received GP care plus non-interventional brief phone calls. | Three divisions of general practice in Tasmania | Diagnosis of COPD, aged 45 years or more, seen by GP in past 12 months, > 10 year pack history, FEV <sub>1</sub> /FVC<0.7, FEV <sub>1</sub> 30-80% predicted | 182         | Int<br>68.2<br>(7.9)<br><br>UC<br>67.3<br>(7.6)   | 52.7%       | Int<br>54.0<br>(13.4)<br><br>UC<br>56.4<br>(13.2) | 6 and 12 months  | SF36<br>SGRQ<br>Partners In Health (PIH)<br>Scale for self-management capacity<br>HADS<br>CES-D<br>Post-Traumatic Stress Disorder Checklist<br>Satisfaction with life and hospital admissions |
| Zwar et al (2012)<br>Australia    | <p><b>Individualised care plan</b><br/>Trained nurses (COPD management) in partnership with GPs and other care providers.</p> <p>Patients received two home visits and five telephone contacts with a nurse, and two consultations with their</p>                                                                 | 6 months     | <b>Usual care</b>                                                                      | General practices using disease registers       | Aged between 40-80 years, prescribed medications used for COPD, and seen the GP in previous 12 months.                                                       | 451         | Int<br>65.8<br>(10.3)<br><br>UC<br>64.4<br>(10.3) | 47.9%       |                                                   | 6 and 12 months  | SGRQ<br>SF12<br>Lung function (FEV <sub>1</sub> )<br>Smoking immunisation status for influenza and pneumococcus<br>Attendance at pulmonary                                                    |

| Author year<br>(country) | Intervention                                                                                                           |                 | Control | Recruitment** | Inclusion<br>Criteria | Sample<br>size | Mean<br>age<br>(SD) | Sex<br>(%male) | Mean<br>FEV <sub>1</sub> %<br>predicted<br>(SD) | Follow-up<br>(mths) | Outcomes                                                                                                      |
|--------------------------|------------------------------------------------------------------------------------------------------------------------|-----------------|---------|---------------|-----------------------|----------------|---------------------|----------------|-------------------------------------------------|---------------------|---------------------------------------------------------------------------------------------------------------|
|                          | Description                                                                                                            | Length<br>(wks) |         |               |                       |                |                     |                |                                                 |                     |                                                                                                               |
|                          | GP. Monthly contacts over the phone between GP and nurse along with two face to face meetings to discuss patient care. |                 |         |               |                       |                |                     |                |                                                 |                     | rehabilitation<br>Patient<br>knowledge of<br>COPD<br>Health service<br>use (GP and<br>Hospital<br>admissions) |



**Supplementary Table 2. Risk of bias**

| <b>Author year</b>      | <b>Sequence generation</b>                                                                                                                        | <b>Allocation concealment</b>                                                                                                                    | <b>Blinding</b>                                                                                                                                                                 | <b>Incomplete outcome reporting</b>                                                                                                                                                                                             | <b>Selective outcome reporting</b>                        | <b>Other Risk of Bias</b>                                                                                                                                                                              |
|-------------------------|---------------------------------------------------------------------------------------------------------------------------------------------------|--------------------------------------------------------------------------------------------------------------------------------------------------|---------------------------------------------------------------------------------------------------------------------------------------------------------------------------------|---------------------------------------------------------------------------------------------------------------------------------------------------------------------------------------------------------------------------------|-----------------------------------------------------------|--------------------------------------------------------------------------------------------------------------------------------------------------------------------------------------------------------|
| Billington et al (2015) | <b>Low</b><br>“randomly assigned by a statistician not conducting the analysis, using a random number generator function on spreadsheet software” | <b>Unclear</b><br>No details given about allocation concealment                                                                                  | <b>Low</b><br>Participants not blinded; baseline data collected by self-completion questionnaire, administered and collected by a staff member not conducting the intervention. | <b>Low</b><br>Follow-up at 3m<br>INT: 34/35<br>UC: 37/38<br>Lost to follow-up<br>1 patient died from each group                                                                                                                 | <b>Unclear</b><br>Protocol not published                  | <b>Unclear</b><br>More smokers in the intervention arm                                                                                                                                                 |
| Bischoff et al (2012)   | <b>Low</b><br>“We randomised participants by using a computer generated two block randomisation procedure”                                        | <b>Unclear</b><br>No details given about allocation concealment                                                                                  | <b>Low</b><br>“To ensure that the investigators were blinded to individual treatment allocation, practice nurses informed the patients of their allocation.”                    | <b>Low</b><br>SM: 49/55 F/U at 24 M<br>RM: 46/55 F/U at 24 M<br>UC: 44/55 F/U at 24 M<br><br>16% dropout –“NO significant difference between dropouts and those completing trial”<br><br>ITT analysis of HRQoL<br>OUTCOMES ONLY | <b>Low</b><br>Published protocol<br>All outcomes reported | <b>Unclear</b><br>Potential for cross contamination between treatment groups, but took steps to minimise this and checked for it at the end of the study                                               |
| Coultas et al (2005)    | <b>Low</b><br>“Patients were randomly assigned to one of three intervention groups ... using a computer-generated random list.”                   | <b>Low</b><br>Allocation concealment not described but person recruiting not aware of allocation at time of recruitment/ baseline data collected | <b>Unclear</b>                                                                                                                                                                  | <b>High</b><br>Not ITT analysis.<br>69.6% f/u balanced across groups - BUT Dropouts – more severe obstruction, higher distress, lower QoL                                                                                       | <b>Unclear</b><br>Protocol not published                  | <b>Unclear</b><br>full-Baseline characteristics published only for trial and f/u completers<br><br>Those invited but declining to participate were younger and more likely to be BME than participants |

| Author year             | Sequence generation                                                                                                                                                                                                                                                                                                                                                                                                                                                  | Allocation concealment                                                                                                                                   | Blinding                                                                                                                                                                                                                         | Incomplete outcome reporting                                                                                                                              | Selective outcome reporting             | Other Risk of Bias                                                                                                                                                                                                                                                                                                                     |
|-------------------------|----------------------------------------------------------------------------------------------------------------------------------------------------------------------------------------------------------------------------------------------------------------------------------------------------------------------------------------------------------------------------------------------------------------------------------------------------------------------|----------------------------------------------------------------------------------------------------------------------------------------------------------|----------------------------------------------------------------------------------------------------------------------------------------------------------------------------------------------------------------------------------|-----------------------------------------------------------------------------------------------------------------------------------------------------------|-----------------------------------------|----------------------------------------------------------------------------------------------------------------------------------------------------------------------------------------------------------------------------------------------------------------------------------------------------------------------------------------|
| Efrainsson et al (2008) | <b>High</b><br>“The randomization was performed when two patients with the same variables agreed to participate in the study by assigning each individual an identity number.”                                                                                                                                                                                                                                                                                       | <b>Unclear</b><br><b>Limited information on lot drawing</b><br>“An independent person drew lots for allocation to either intervention or control group.” | <b>Unclear</b><br>No information about blinding.                                                                                                                                                                                 | <b>High</b><br>ITT analysis significant information about drop-outs -BUT more smokers (30 vs 58%) and more “moderate COPD” (60% vs 37%) in drop out group | <b>Unclear</b><br>No published protocol | <b>Unclear</b><br>Only limited baseline data reported but patients matched for variables and statement “comorbidities similar”                                                                                                                                                                                                         |
| Freund et al (2016)     | <b>Low</b><br>Primary care practices were randomly allocated to care management or usual care in a 1:1 ratio by block randomization with variable block lengths..... stratified randomization according to the population density of the participating practice sites.<br>We used computer-generated randomization lists (SAS, version 9.2 [SAS Institute]). A research assistant who was not otherwise involved in the project performed the central randomization. | <b>Unclear</b><br>We informed physicians about their allocation via an official letter and asked them to inform participating patients.                  | <b>Low</b><br>Blinding primary care physicians, medical assistants, and patients was not possible. Blinded assessment of the primary and secondary end points as well as the responsible statistician to study group allocation. | <b>Low</b><br>ITT analysis<br><b>Int: /1093 F/U 12 M</b><br><b>UC: /983 F/U 12 M</b><br><br>90.3% F/U at 12 M<br>92.4% F/U at 24m                         | <b>Low</b><br>published protocol        | <b>High</b><br>No smoking status in baseline characteristics<br><br>No baseline lung function or description of diagnosis of COPD by spirometry<br><br>Enrolled patients were younger than those who declined to participate and had fewer all-cause hospitalizations in the year preceding the trial than those who were not enrolled |

| Author year           | Sequence generation                                                                                                                                                                                                               | Allocation concealment                                          | Blinding                                                                                                                                                                                     | Incomplete outcome reporting                                                                                                                                           | Selective outcome reporting              | Other Risk of Bias                                                                                                                                                                              |
|-----------------------|-----------------------------------------------------------------------------------------------------------------------------------------------------------------------------------------------------------------------------------|-----------------------------------------------------------------|----------------------------------------------------------------------------------------------------------------------------------------------------------------------------------------------|------------------------------------------------------------------------------------------------------------------------------------------------------------------------|------------------------------------------|-------------------------------------------------------------------------------------------------------------------------------------------------------------------------------------------------|
| Howard et al (2014)   | <b>Low</b><br>Simple blocked random sampling was undertaken.<br>Computerised random blocks of six at a time were randomised, three in each group.                                                                                 | <b>Unclear</b><br>No details given about allocation concealment | <b>Unclear</b><br>Participants were blind to group allocation.<br>Primary and secondary care staff were aware of patients' participation in the trial, but were unaware of group allocation. | <b>Low</b><br>ITT analysis<br>45.5% loss to F/U at 6m<br><br>12M F/U:<br>CM: 97/112<br>IB: 102/110                                                                     | <b>Unclear</b><br>Protocol not published | <b>Low</b>                                                                                                                                                                                      |
| Lou et al (2015)      | <b>High</b><br>Centres with experience and those without were then randomly allocated separately into the health management and control groups to prevent an imbalance between interventions in centres with previous experience. | <b>Unclear</b><br>No details                                    | <b>Unclear</b><br>No information on Blinding<br>-<br>Individual who conducted data collection not stated                                                                                     | <b>High</b><br>No ITT analysis<br><br>Int: 3418/4197 at 4 year FU (81.4%)<br>UC: 2803/4020 at 4 year FU (69.7%)<br><br>Deaths:<br>Int: 14.5%; UC 19.4%                 | <b>Unclear</b><br>No published protocol  | <b>Unclear</b><br>High number of deaths in the usual care arm                                                                                                                                   |
| Mitchell et al (2014) | <b>Low</b><br>"Participants were assigned to either usual care or SPACE FOR COPD via a web-based, concealed allocation programme, using simple randomisation codes prepared by the trial statistician"                            | <b>Low</b><br>"via a web-based, concealed allocation programme, | <b>Low</b><br>"The assessments at 6W and 6M were conducted by a member of the research team who was blind to randomisation allocation"                                                       | <b>Low</b><br>ITT analysis at 6M<br><br>F/U at 6m:<br>SPACE: 65/89 (73.0%)<br>UC: 79/95 (83.2%)<br>"characteristics of dropouts and completers similar" but no detail. | <b>Low</b><br>published protocol         | <b>Unclear</b><br>wide range of characteristics reported for all participants <i>BUT</i> gender imbalance at baseline ( 60%/ 49% male SPACE/ UC, greater smoking exposure in Intervention group |

| Author year         | Sequence generation                                                                                                         | Allocation concealment                                                                                           | Blinding                                                                                                                                                                                                           | Incomplete outcome reporting                                                                                                                                                                                  | Selective outcome reporting                                                           | Other Risk of Bias                                                                                                                                                                                                    |
|---------------------|-----------------------------------------------------------------------------------------------------------------------------|------------------------------------------------------------------------------------------------------------------|--------------------------------------------------------------------------------------------------------------------------------------------------------------------------------------------------------------------|---------------------------------------------------------------------------------------------------------------------------------------------------------------------------------------------------------------|---------------------------------------------------------------------------------------|-----------------------------------------------------------------------------------------------------------------------------------------------------------------------------------------------------------------------|
| Rea et al (2003)    | <b>Low</b><br>“Fifty-one eligible practices with 116 GPs were randomized, using a set of computer-generated random numbers” | <b>Unclear</b><br>no detail given on allocation concealment/ not explicitly stated                               | <b>Unclear</b><br>No information on Blinding<br><br>Individual who conducted data collection not stated                                                                                                            | <b>Low</b><br>F/U at 12 M:<br>Int: 71/83 (85.5%)<br>Con: 46/52 (88.5%)<br><br>Significant information about drop-outs but no details of characteristics<br><br>ITT analysis for admissions<br>BUT NOT FOR QoL | <b>Unclear</b><br>no published protocol but outcome measures listed in paper reported | <b>Unclear</b><br>Baseline data NOT fully reported<br>Smoking not included as a variable But statement “no significant difference in baseline demographic and clinical characteristics “                              |
| Taylor et al (2012) | <b>Unclear</b><br>“Following baseline assessment, patients were randomised 2:1”                                             | <b>Unclear</b><br>“... patients were randomised 2:1, intervention: control, maintaining allocation concealment.” | <b>High</b><br>“Questionnaires were self-completed by patients at home, in the presence of a researcher not associated with the intervention.”<br><br>Healthcare utilisation –<br><b>Low:</b> From medical records | <b>High</b><br>F/U at 6 M:<br>Int: 61/78 (78.2%)<br>UC: 30/38 (78.9%)<br><br>Significant information about drop-outs But nil comment on baseline characteristics for dropouts vs completers.<br><br>Not ITT   | <b>Unclear</b><br>No published protocol                                               | <b>High</b><br>Baseline imbalance – data reported for all participants at baseline BUT imbalance in male: female ratio, current smoking and previous pulmonary rehabilitation between control and Intervention groups |

| Author year          | Sequence generation                                                                                                                                                                                                                                                                                                       | Allocation concealment                                                                                                                                | Blinding                                                                                                                                               | Incomplete outcome reporting                                                                                                                                                                                         | Selective outcome reporting                 | Other Risk of Bias                                                                                                                                                                                                                                 |
|----------------------|---------------------------------------------------------------------------------------------------------------------------------------------------------------------------------------------------------------------------------------------------------------------------------------------------------------------------|-------------------------------------------------------------------------------------------------------------------------------------------------------|--------------------------------------------------------------------------------------------------------------------------------------------------------|----------------------------------------------------------------------------------------------------------------------------------------------------------------------------------------------------------------------|---------------------------------------------|----------------------------------------------------------------------------------------------------------------------------------------------------------------------------------------------------------------------------------------------------|
| Walters et al (2013) | <b>Low</b><br>“After recruitment, practices were randomised using a code generated by investigators from a random numbers table stratified in blocks of four”                                                                                                                                                             | <b>Low</b><br>“Allocation occurred independently using sequentially numbered, opaque and sealed envelopes.”                                           | <b>Low</b><br>Intervention vs sham intervention<br><br>“Blinding of participants or research officers was not possible given the nature of the study.” | <b>High</b><br>F/U at 12 M:<br>Int: 74/90 (82.2%)<br>UC: 80/92 (87.0%)<br><br>Significant information about drop-outs , BUT no comparison of characteristics of dropouts vs trial completers<br><br>Not ITT analysis | <b>Unclear</b><br><br>No published protocol | <b>High</b><br>Baseline characteristics reported for all participants<br>Baseline imbalance in Smoking exposure (43.4 vs 53.9 pack years), current smoking 36 vs 48 % and medication.<br><br>Reported low fidelity of delivery of the intervention |
| Zwar et al (2012)    | <b>Low</b><br>“A cluster randomised trial, with randomisation at the level of the practice, was conducted to avoid contamination between intervention and control groups.”<br><br>“A researcher who took no further part in the study randomised practices”<br><br>Protocol- computer generated list and sealed envelopes | <b>Low</b><br>A researcher who took no further part in the study randomised practices to intervention or control groups, with allocation concealment. | <b>Low</b><br>Assessments were conducted by project officers who took no part in the intervention and were blind to group allocation.                  | <b>Unclear</b><br>ITT analysis<br><br>330/451 (73.2%) completed<br>12 M F/U                                                                                                                                          | <b>Low</b><br><br>published protocol        | <b>High</b><br>Baseline imbalance in lung function                                                                                                                                                                                                 |

**Supplementary Figure 1: Meta-analysis of SGRQ-impacts scores**

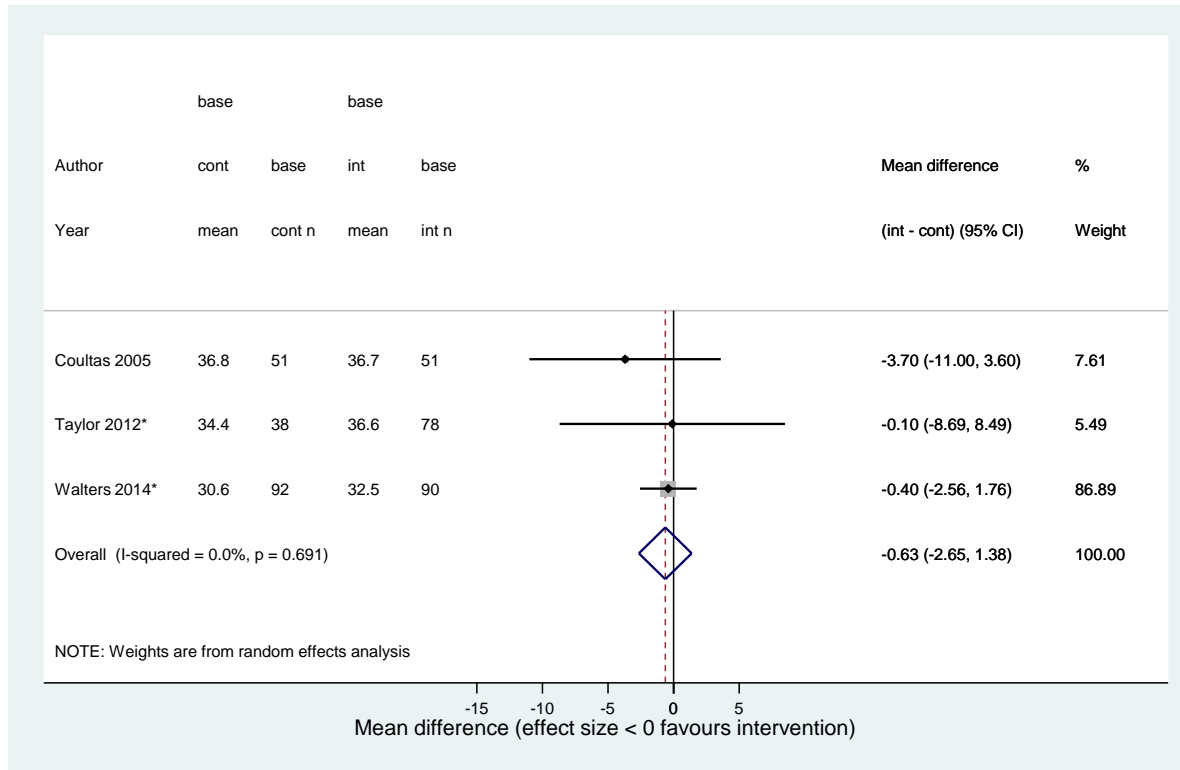

**Supplementary Figure 2: Meta-analysis of SGRQ-symptoms scores**

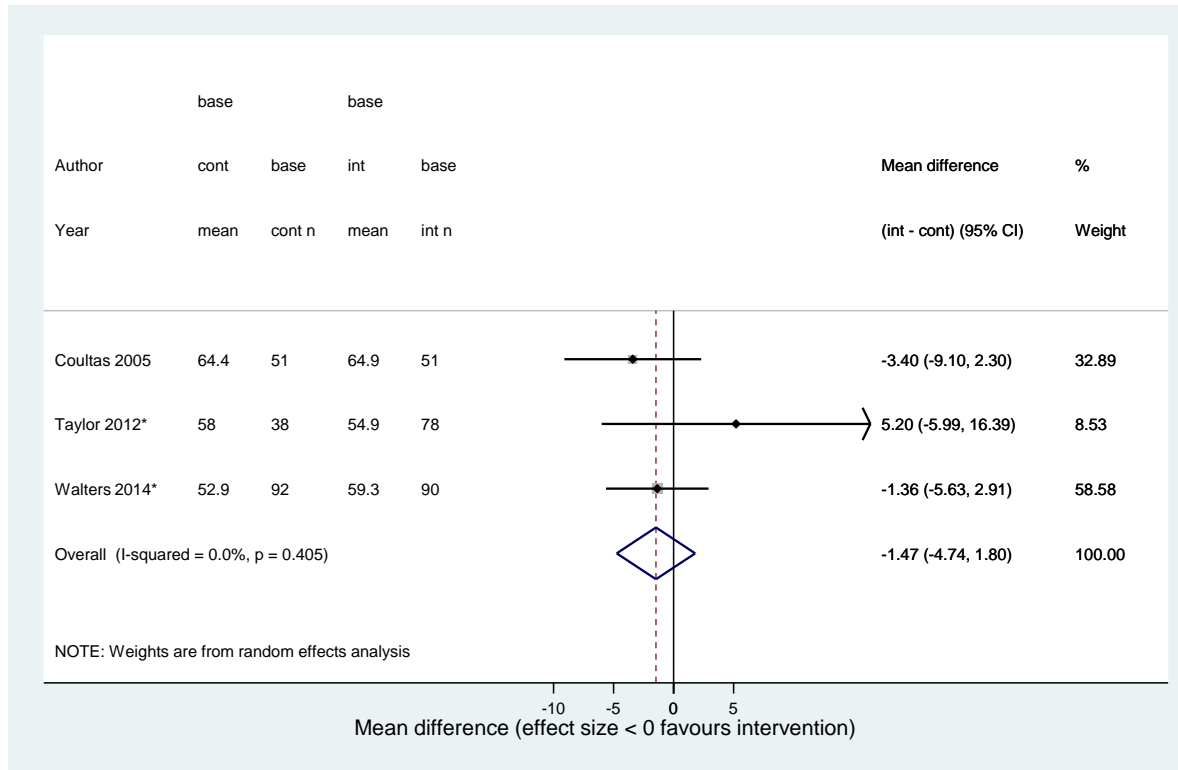

**Supplementary Figure 3: Meta-analysis of SGRQ-activity scores**

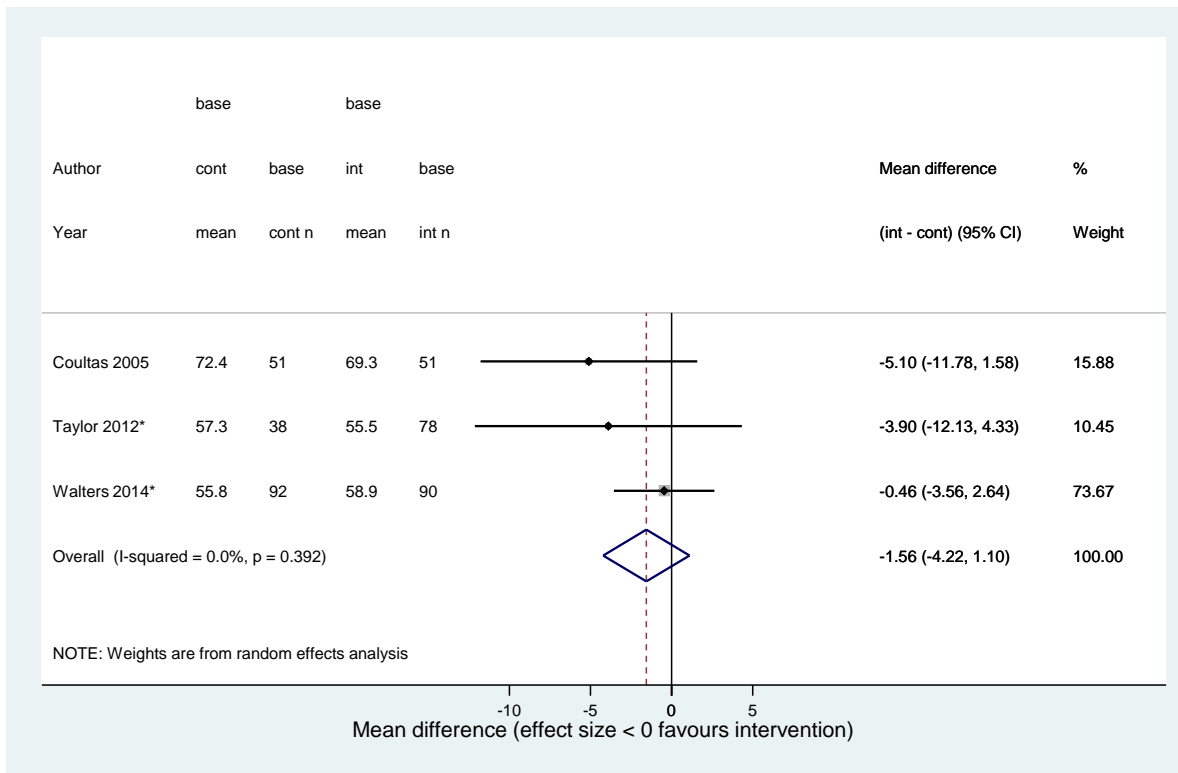



**Supplementary Figure 4: Meta-analysis of CRQ-dyspnea scores**

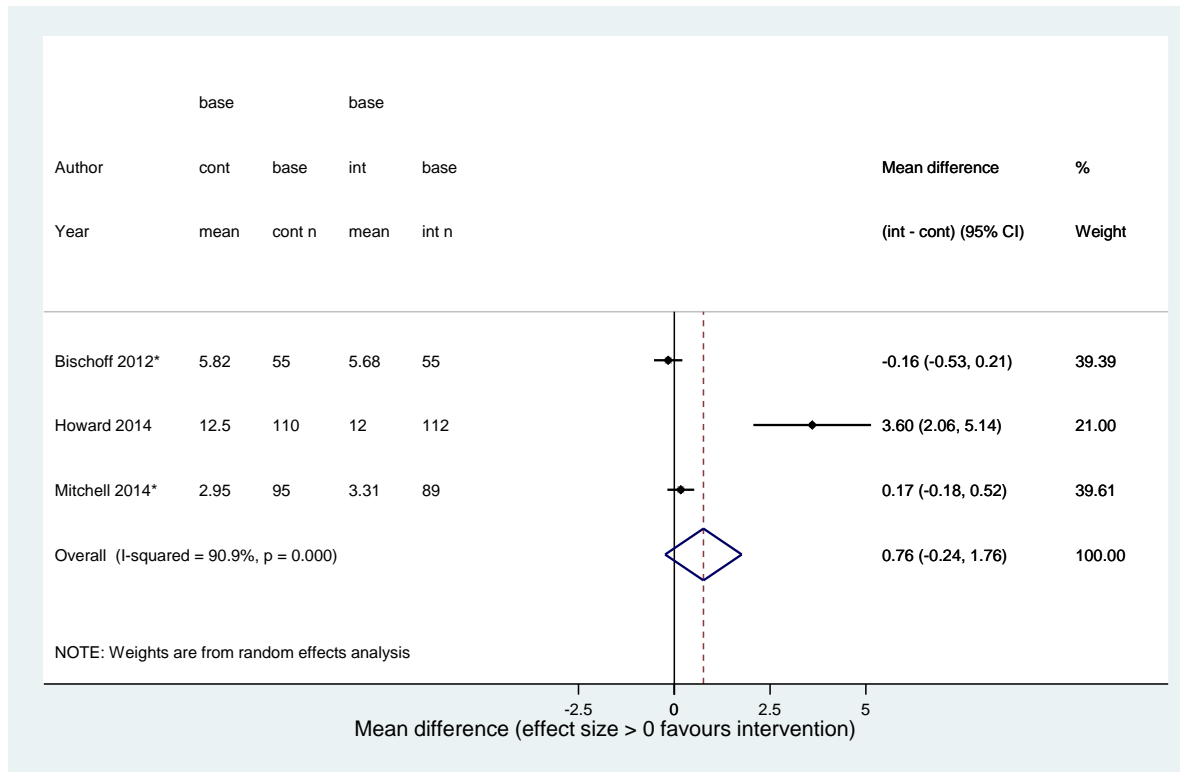

**Supplementary Figure 5: Meta-analysis of CRQ-emotions scores**

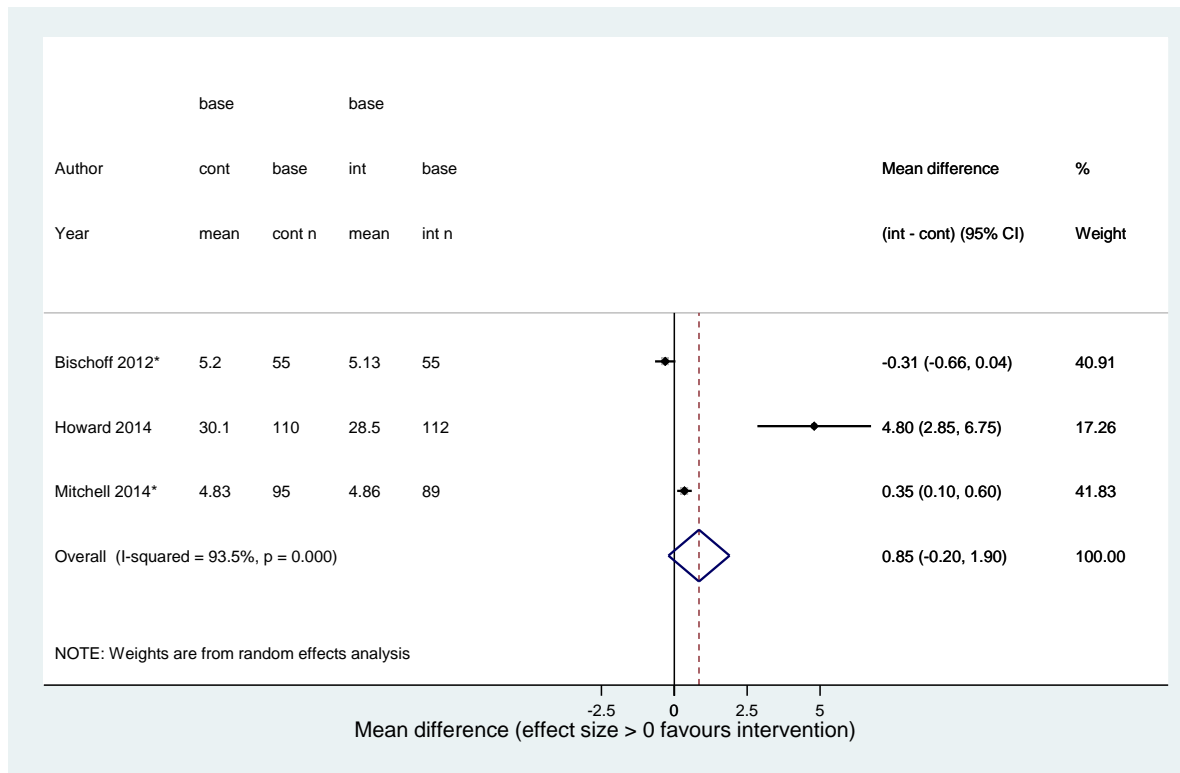

**Supplementary Figure 6: Meta-analysis of CRQ-fatigue scores**

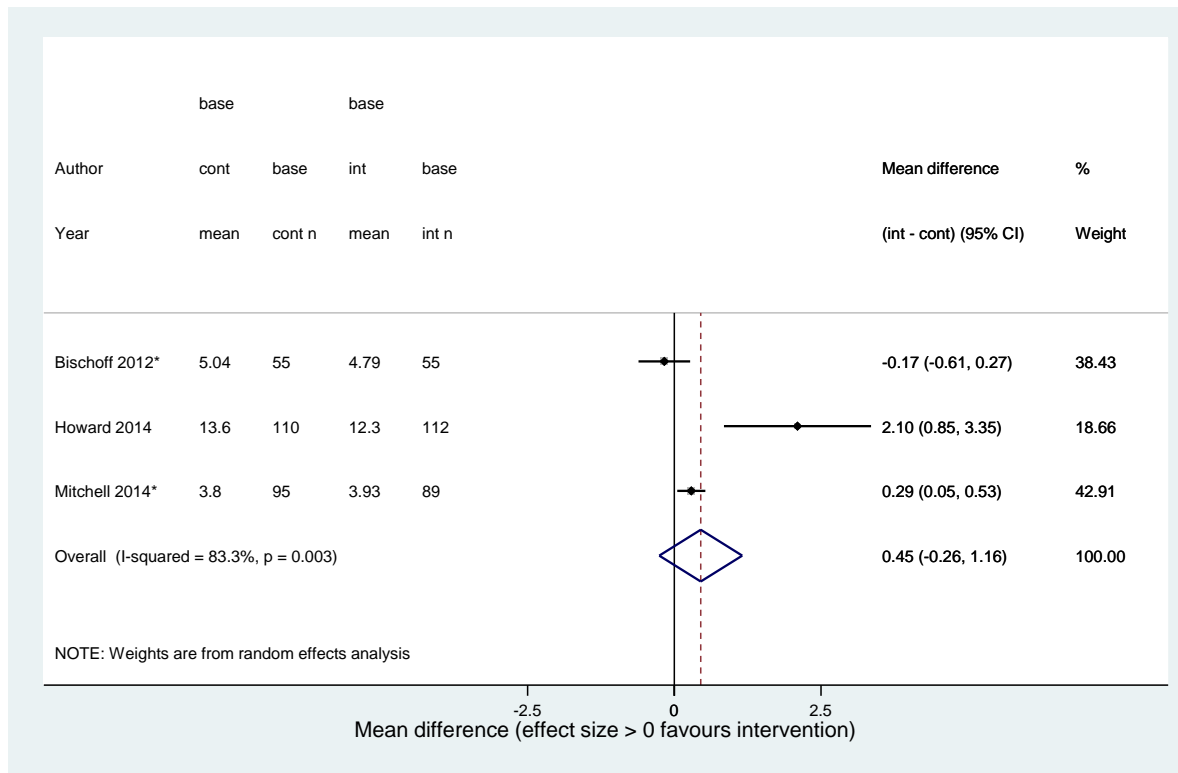

**Supplementary Figure 7: Meta-analysis of CRQ-mastery scores**

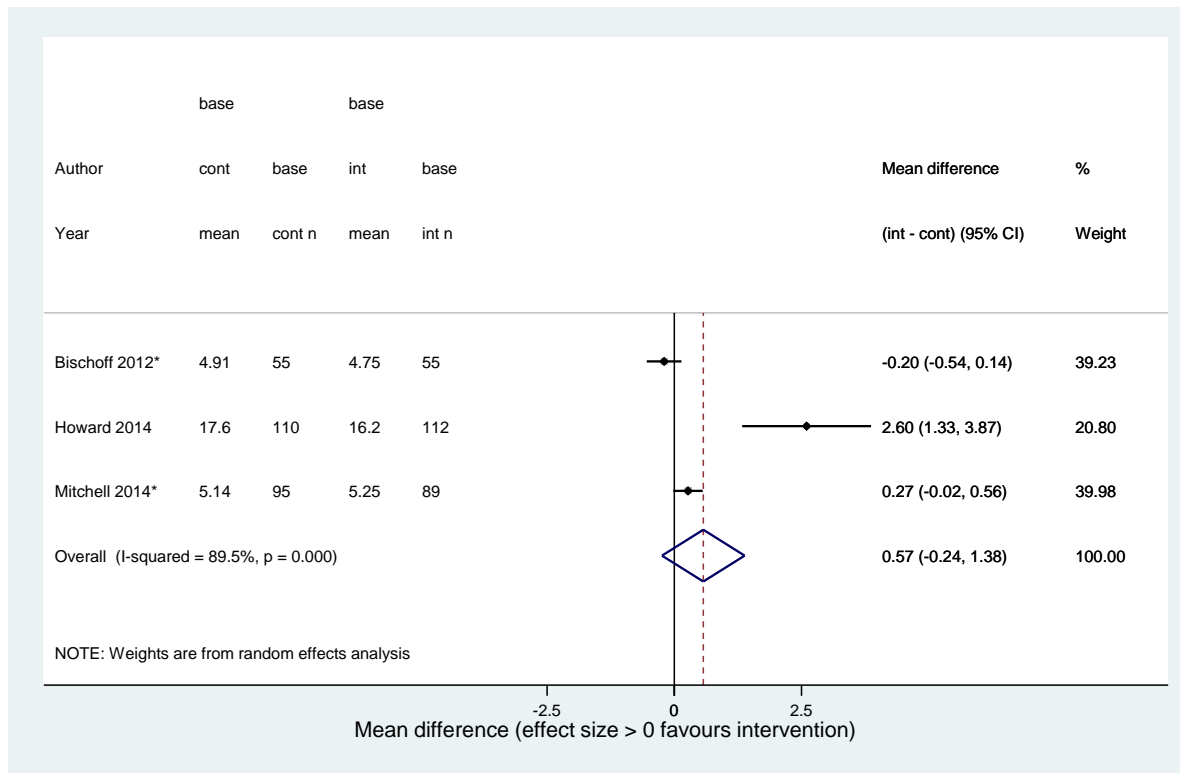

**Supplementary Figure 8: Meta-analysis of HADS anxiety scores**

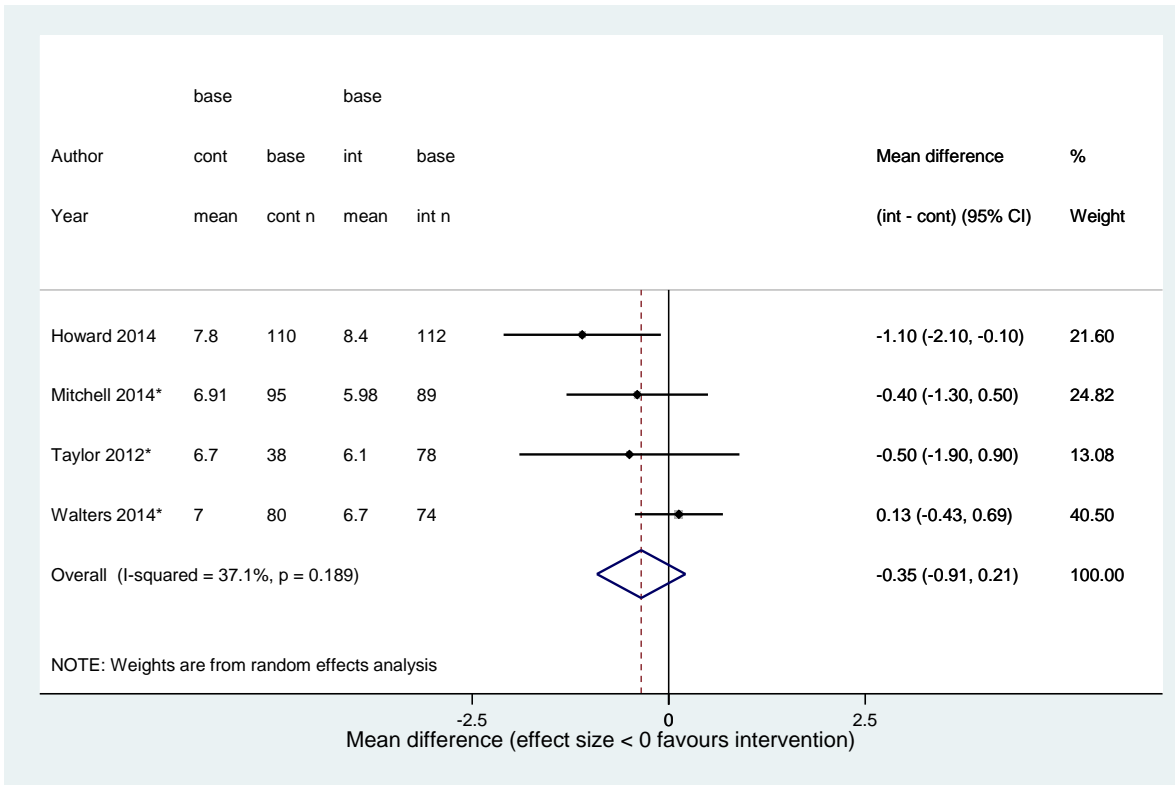

**Supplementary Figure 9: Meta-analysis of HADS depression scores**

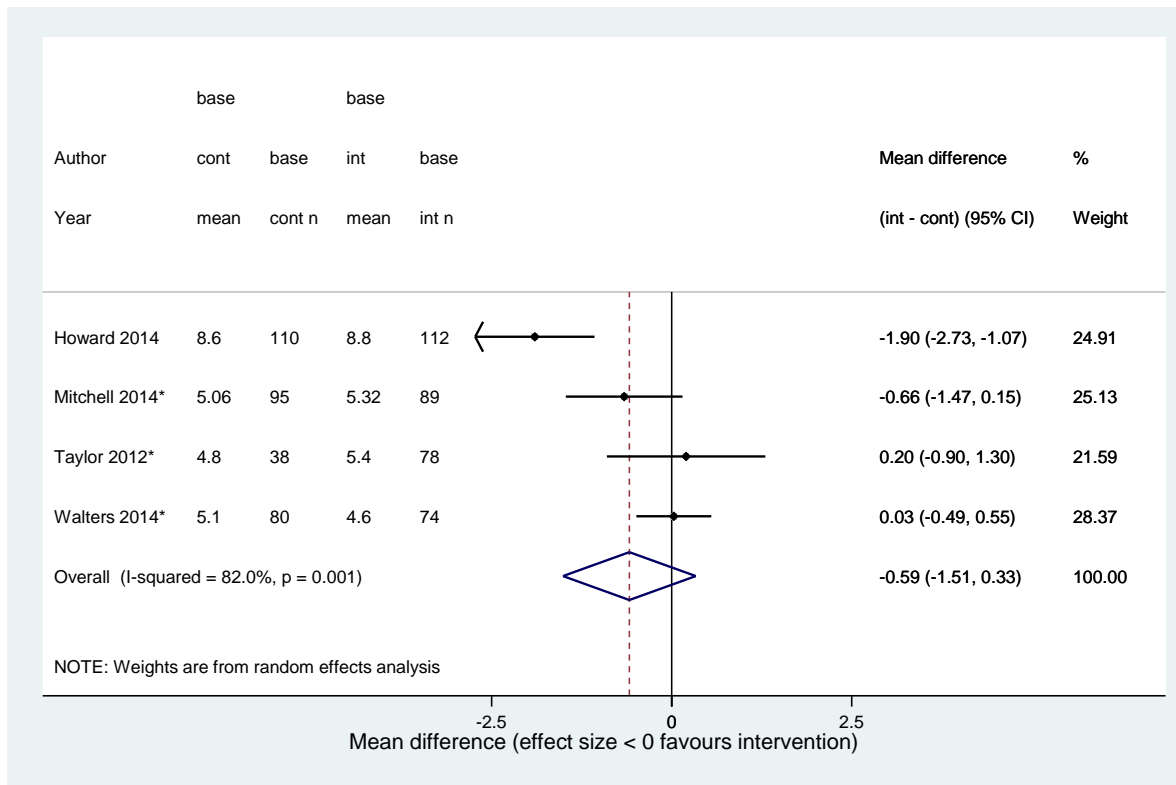

## Supplementary methods – Search strategy for Medline

Database: Ovid MEDLINE(R) In-Process & Other Non-Indexed Citations October 05, 2017

Search Strategy:

- 1 chronic obstructive pulmonary disease.mp.
- 2 copd.mp.
- 3 chronic obstructive lung disease.mp.
- 4 chronic obstructive airway disease.mp.
- 5 chronic respiratory disorder\$.ti,ab.
- 6 smoking-related lung disease\$.ti,ab.
- 7 emphysema.ti,ab.
- 8 bronchitis.ti,ab.
- 9 or/1-8
- 10 (self adj2 (support\$ or care or caring or manage\$)).ti,ab.
- 11 post discharge.ti,ab.
- 12 early discharge.ti,ab.
- 13 home care.ti,ab.

- 14 home nursing.ti,ab.
- 15 patient centred care.ti,ab.
- 16 patient centered care.ti,ab.
- 17 patient education.mp.
- 18 patient participation.ti,ab.
- 19 post hospital care.ti,ab.
- 20 action planning.ti,ab.
- 21 discharge planning.ti,ab.
- 22 (continuity adj2 care).ti,ab.
- 23 (support\$ adj2 (discharge or manage\$)).ti,ab.
- 24 patient focus\$.ti,ab.
- 25 management plan\$.mp.
- 26 management program\$.ti,ab.
- 27 rehabilitation.ti,ab.
- 28 or/10-27
- 29 9 and 28
- 30 community.mp.
- 31 family physician\$.mp.



- 32 GP\$.mp.
- 33 (general practitioner\$ or general practice).mp. [mp=title, abstract, original title, name of substance word, subject heading word, keyword heading word, protocol supplementary concept word, rare disease supplementary concept word, unique identifier, synonyms]
- 34 (family practition\$ or family practic\$).mp. [mp=title, abstract, original title, name of substance word, subject heading word, keyword heading word, protocol supplementary concept word, rare disease supplementary concept word, unique identifier, synonyms]
- 35 (primary adj (care or healthcare)).ti,ab.
- 36 or/30-35
- 37 29 and 36
- 38 limit 37 to yr="2016 - 2017"

**Database: Ovid MEDLINE(R) 1946 to September Week 4 2017**

Search Strategy:

- 1 chronic obstructive pulmonary disease.mp. or exp Pulmonary Disease, Chronic Obstructive/
- 2 copd.mp.
- 3 chronic obstructive lung disease.mp.
- 4 chronic obstructive airway disease.mp.
- 5 chronic respiratory disorder\$.mp.

- 6 smoking-related lung disease\$.mp.
- 7 Pulmonary Emphysema/
- 8 exp Bronchitis/
- 9 emphysema.mp.
- 10 or/1-9
- 11 exp Self Care/
- 12 (self adj2 (support\$ or care or caring or manage\$)).mp. [mp=title, abstract, original title, name of substance word, subject heading word, keyword heading word, protocol supplementary concept word, rare disease supplementary concept word, unique identifier, synonyms]
- 13 post discharge.mp.
- 14 early discharge.mp.
- 15 home care.mp.
- 16 home care services/ or home nursing/
- 17 patient centred care.mp.
- 18 patient centered care.mp.
- 19 patient education/ or patient education.mp.
- 20 patient participation.mp.
- 21 post hospital care.mp.
- 22 action planning.mp.

- 23 discharge planning.mp.
- 24 continuity of patient care/
- 25 (support\$ adj2 discharge).mp. [mp=title, abstract, original title, name of substance word, subject heading word, keyword heading word, protocol supplementary concept word, rare disease supplementary concept word, unique identifier, synonyms]
- 26 (support\$ adj2 manag\$).mp. [mp=title, abstract, original title, name of substance word, subject heading word, keyword heading word, protocol supplementary concept word, rare disease supplementary concept word, unique identifier, synonyms]
- 27 patient focus\$.mp.
- 28 management plan\$.mp.
- 29 management program\$.mp.
- 30 rehabilitation.mp. or exp Rehabilitation/
- 31 or/11-30
- 32 10 and 31
- 33 community.mp.
- 34 family physician\$.mp. or exp Physicians, Family/
- 35 GP\$.mp.
- 36 exp Family Practice/ or exp General Practice/
- 37 (general practitioner\$ or general practice).mp. [mp=title, abstract, original title, name of substance word, subject heading word, keyword heading word, protocol supplementary concept word, rare disease supplementary concept word, unique identifier, synonyms]

38 (family practition\$ or family practic\$).mp. [mp=title, abstract, original title, name of substance word, subject heading word, keyword heading word, protocol supplementary concept word, rare disease supplementary concept word, unique identifier, synonyms]

39 or/33-38

40 32 and 39

41 limit 40 to "therapy (maximizes sensitivity)"

42 limit 41 to yr="2016 - 2017"
